# Supplementary material for: Effectiveness of Platelet-Rich Plasma Injection in Rotator Cuff Tendinopathy: A Systematic Review and Meta-Analysis of Randomized Controlled Trials
Source: PubMed Central journal article supplement (PMC7235747; doi:10.3390/diagnostics10040189), 2020-03-28
Supplement: diagnostics-10-00189-s001.pdf [file diagnostics-10-00189-s001.pdf]

1 **s-Methods**

2 *Identification of trials and search method*

3 Text words with key terms for electronic databases:

4 **1. PubMed, The Cochrane Collaboration Central Register of Controlled Clinical**  
5 **Trials and Cochrane Database of Systematic Reviews :**

6 (“rotator cuff” OR subacromial OR sub-acromial OR impinge\* OR supraspinat\* OR  
7 infraspinat\* OR subscapular\* OR “teres minor”)

8 **AND** (autologous OR platelet or plasma OR PRP OR platelet rich plasma OR platelet  
9 gel OR platelet derived growth factors OR platelet concentrate OR PRGF OR ACP  
10 OR autologous conditioned plasma OR platelet lysate OR platelet rich fibrin OR  
11 platelet rich membrane)

12

13 **2.EMBASE and Scopus:**

14 #1 'rotator cuff'/exp OR 'rotator cuff'

15 #2 'subacromial'/exp OR impinge\* OR supraspinat\* OR infraspinat\* OR subscapular\*

16 OR 'teres minor'

17 #3 #1 OR #2

18 #4 'autologous' OR 'platelet' or 'plasma' OR 'PRP' OR 'platelet rich plasma' OR

19 'platelet gel' OR 'platelet derived growth factors' OR 'platelet concentrate' OR

20 'PRGF' OR 'ACP'

21 #5 arthroscop\* OR arthroplas\* OR acromioplas\* OR 'adhesive capsulitis'/exp OR

22 'rat'/exp OR 'mice'/exp OR 'animal'/exp)

23 #6 #3 AND #4 NOT #5

24

25

26 *Data synthesis and analysis*

27 Pooled SD<sub>intervention</sub> = the square root of  $\{[(\text{participant numbers}_{\text{baseline}} - 1) * (\text{SD}_{\text{baseline}})^2$   
28  $+ (\text{participant numbers}_{\text{post-intervention}} - 1) * (\text{SD}_{\text{post-intervention}})^2] / [(\text{participant numbers}_{\text{baseline}} - 1) + (\text{participant numbers}_{\text{post-intervention}} - 1)]\}$ .

30

31 Pooled SD<sub>between-interventions</sub> = the square root of  $\{[(\text{participant numbers}_{\text{First intervention}} - 1) * (\text{pooled SD}_{\text{First intervention}})^2 + (\text{participant numbers}_{\text{Second intervention}} - 1) * (\text{pooled SD}_{\text{Second intervention}})^2] / [(\text{participant numbers}_{\text{First intervention}} - 1) + (\text{participant numbers}_{\text{Second intervention}} - 1)]\}$ .

35

36

37

38

39

40

41

42

43

44

45

46

47

48

49

### A. Pain reduction 3 – 6 weeks

| Study or Subgroup     | Weight        | Std. Mean Difference |                      | Year |
|-----------------------|---------------|----------------------|----------------------|------|
|                       |               | IV, Random, 95% CI   | Year                 |      |
| Rha 2013              | 14.1%         | 0.32                 | [-0.31, 0.96]        | 2013 |
| Kesikibunun 2013      | 14.5%         | -0.23                | [-0.85, 0.40]        | 2013 |
| Ihanli 2015           | 33.5%         | 0.19                 | [-0.22, 0.60]        | 2015 |
| Nejati 2017           | 22.6%         | -0.11                | [-0.61, 0.39]        | 2017 |
| Cai 2018              | 15.3%         | -0.12                | [-0.73, 0.48]        | 2018 |
| <b>Total (95% CI)</b> | <b>100.0%</b> | <b>0.03</b>          | <b>[-0.20, 0.27]</b> |      |

Heterogeneity: Tau<sup>2</sup> = 0.00; Chi<sup>2</sup> = 2.63, df = 4 (P = 0.62); I<sup>2</sup> = 0%  
Test for overall effect: Z = 0.27 (P = 0.79)

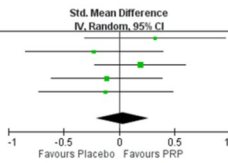

### B. Functional improvement 3 – 6 weeks

| Study or Subgroup     | Weight        | Std. Mean Difference |                      | Year |
|-----------------------|---------------|----------------------|----------------------|------|
|                       |               | IV, Random, 95% CI   | Year                 |      |
| Rha 2013              | 18.9%         | 0.32                 | [-0.21, 0.95]        | 2013 |
| Kesikibunun 2013      | 19.1%         | 0.15                 | [-0.47, 0.77]        | 2013 |
| Ihanli 2015           | 20.9%         | 0.21                 | [-0.29, 0.71]        | 2015 |
| Nejati 2017           | 19.3%         | -0.35                | [-0.97, 0.26]        | 2017 |
| Cai 2018              | 21.7%         | 1.20                 | [0.75, 1.64]         | 2018 |
| <b>Total (95% CI)</b> | <b>100.0%</b> | <b>0.33</b>          | <b>[-0.22, 0.87]</b> |      |

Heterogeneity: Tau<sup>2</sup> = 0.30; Chi<sup>2</sup> = 19.37, df = 4 (P = 0.0007); I<sup>2</sup> = 79%  
Test for overall effect: Z = 1.17 (P = 0.24)

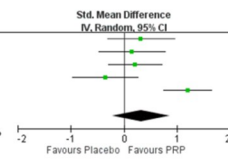

### 12 weeks

| Study or Subgroup     | Weight        | Std. Mean Difference |                      | Year |
|-----------------------|---------------|----------------------|----------------------|------|
|                       |               | IV, Random, 95% CI   | Year                 |      |
| Rha 2013              | 15.4%         | 0.72                 | [0.01, 1.44]         | 2013 |
| Kesikibunun 2013      | 20.3%         | 0.08                 | [-0.54, 0.70]        | 2013 |
| Nejati 2017           | 43.0%         | 0.32                 | [-0.10, 0.73]        | 2017 |
| Cai 2018              | 21.2%         | -0.08                | [-0.69, 0.52]        | 2018 |
| <b>Total (95% CI)</b> | <b>100.0%</b> | <b>0.25</b>          | <b>[-0.04, 0.53]</b> |      |

Heterogeneity: Tau<sup>2</sup> = 0.01; Chi<sup>2</sup> = 3.22, df = 3 (P = 0.36); I<sup>2</sup> = 7%  
Test for overall effect: Z = 1.68 (P = 0.09)

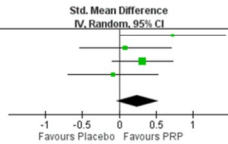

### 12 weeks

| Study or Subgroup     | Weight        | Std. Mean Difference |                      | Year |
|-----------------------|---------------|----------------------|----------------------|------|
|                       |               | IV, Random, 95% CI   | Year                 |      |
| Kesikibunun 2013      | 25.0%         | 0.33                 | [-0.29, 0.96]        | 2013 |
| Rha 2013              | 24.6%         | 0.72                 | [0.01, 1.44]         | 2013 |
| Nejati 2017           | 25.1%         | -0.55                | [-1.17, 0.07]        | 2017 |
| Cai 2018              | 25.3%         | 2.64                 | [2.07, 3.20]         | 2018 |
| <b>Total (95% CI)</b> | <b>100.0%</b> | <b>0.79</b>          | <b>[-0.62, 2.20]</b> |      |

Heterogeneity: Tau<sup>2</sup> = 1.98; Chi<sup>2</sup> = 60.91, df = 3 (P < 0.00001); I<sup>2</sup> = 95%  
Test for overall effect: Z = 1.09 (P = 0.27)

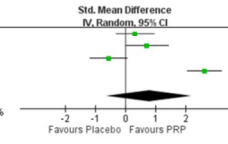

### Over 24 weeks

| Study or Subgroup     | Weight        | Std. Mean Difference |                     | Year |
|-----------------------|---------------|----------------------|---------------------|------|
|                       |               | IV, Random, 95% CI   | Year                |      |
| Kesikibunun 2013      | 19.8%         | 0.36                 | [-0.26, 0.99]       | 2013 |
| Rha 2013              | 18.9%         | 0.65                 | [-0.09, 1.39]       | 2013 |
| Ihanli 2015           | 20.8%         | 0.41                 | [-0.09, 0.92]       | 2015 |
| Nejati 2017           | 19.9%         | 0.34                 | [-0.27, 0.95]       | 2017 |
| Cai 2018              | 20.6%         | 2.22                 | [1.70, 2.75]        | 2018 |
| <b>Total (95% CI)</b> | <b>100.0%</b> | <b>0.81</b>          | <b>[0.03, 1.58]</b> |      |

Heterogeneity: Tau<sup>2</sup> = 0.69; Chi<sup>2</sup> = 34.56, df = 4 (P < 0.00001); I<sup>2</sup> = 88%  
Test for overall effect: Z = 2.03 (P = 0.04)

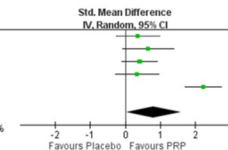

### Over 24 weeks

| Study or Subgroup     | Weight        | Std. Mean Difference |                      | Year |
|-----------------------|---------------|----------------------|----------------------|------|
|                       |               | IV, Random, 95% CI   | Year                 |      |
| Kesikibunun 2013      | 20.1%         | 0.50                 | [-0.13, 1.13]        | 2013 |
| Rha 2013              | 19.8%         | 0.64                 | [-0.09, 1.38]        | 2013 |
| Ihanli 2015           | 20.4%         | 0.65                 | [0.14, 1.16]         | 2015 |
| Nejati 2017           | 20.1%         | -0.18                | [-0.79, 0.42]        | 2017 |
| Cai 2018              | 19.7%         | 4.43                 | [3.68, 5.21]         | 2018 |
| <b>Total (95% CI)</b> | <b>100.0%</b> | <b>1.20</b>          | <b>[-0.20, 2.59]</b> |      |

Heterogeneity: Tau<sup>2</sup> = 2.43; Chi<sup>2</sup> = 95.58, df = 3 (P < 0.00001); I<sup>2</sup> = 96%  
Test for overall effect: Z = 1.68 (P = 0.09)

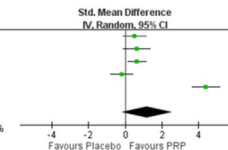

50

51 Supplemental Fig S1. Forest plots of meta-analysis: comparison between  
 52 PRP injection and placebo in pain reduction (**left**) and functional improvement  
 53 (**right**) at short term (A, 3–6 weeks), medium term (B, 12 weeks) and long  
 54 term (C, over 24 weeks). Abbreviation: PRP, plate-rich plasma.

55

56
